# Supplementary material
Source: PubMed Central journal article supplement (PMC4249264)
Supplement: IAI.02287-14_zii999090969so1.pdf [file IAI.02287-14_zii999090969so1.pdf]

**Table S1. Primers used in this study.**

| Primer  | Gene/sequence             | Sequence (5' to 3')                      |
|---------|---------------------------|------------------------------------------|
| CMD175  | MCS_pGEM                  | GTAAAACGACGGCCAGTGA                      |
| CMD176  | MCS_pGEM                  | CAGGAAACAGCTATGACCATG                    |
| CMD290  | <i>fur</i> ::FRT          | CGCGCCAAAGGCACGATGTT                     |
| CMD291  | <i>fur</i> ::FRT          | GCAGCAAAGAAGATCTGGAAGC                   |
| CMD1067 | Tn7T-Gen                  | TGCGGTCAATTGTACCGCACAGATGCGTAAGGAGAA     |
| CMD1068 | Tn7T-Gen                  | AACGCCGCTCGAGTTTATAGTCCTGTCCGGTTTCGCCA   |
| CMD1073 | <i>pstS</i> _Tn7          | AGATCAGTTTGGTGTACGCCAGGT                 |
| CMD1171 | <i>ryhB</i> :: <i>cat</i> | TTTGGGGTAAATGTCCCTTTC                    |
| CMD1172 | <i>ryhB</i> :: <i>cat</i> | GTGCGCATAACGAACACAAG                     |
| CMD1188 | <i>fur</i> :: <i>kan</i>  | TCATTTAGGCGTGGCAATTC                     |
| CMD1189 | <i>fur</i> :: <i>kan</i>  | TGAGAGCTGTAACTCTCGCTTTTC                 |
| CMD1269 | <i>fur</i>                | TGCTGTGGTACCTGTAAGCTGTGCCACGTTTT (KpnI)  |
| CMD1270 | <i>fur</i>                | ACAGGTACCTGAGAGCTGTAACTCTCGCTTTTC (KpnI) |
| CMD1271 | <i>ryhB</i>               | GTACTCGAGTGTTTCTGCGTGGCGTATTAC (XhoI)    |
| CMD1272 | <i>ryhB</i>               | CCTCCCGGGAAAGCGGACGTGGTTCCTAC (XmaI)     |
| CMD1394 | <i>lacA</i>               | GATAAGCGVAGCGYATCAGG                     |
| qRT-PCR |                           |                                          |
| CMD1484 | <i>entB</i>               | AGCACCTATCCCCGCCAGCA                     |
| CMD1485 | <i>entB</i>               | TGCGCACCGAATCCAGACCG                     |
| CMD1488 | <i>iroB</i>               | GGGTATTGCCTGCTCCGCCA                     |
| CMD1489 | <i>iroB</i>               | GTCCGATTTGCGCTCGCTGC                     |
| CMD1492 | <i>iucA</i>               | AAGCCGGGAGAGAGTGGTAAAGTCG                |
| CMD1493 | <i>iucA</i>               | TCCCCAACCCAGCATCACCG                     |
| CMD1496 | <i>cysE</i>               | AACGCTGGCGGACTGTGAGC                     |
| CMD1497 | <i>cysE</i>               | GCGGCGTAGGCTTCTTCCACC                    |

|         |             |                         |
|---------|-------------|-------------------------|
| CMD1583 | <i>cirA</i> | CCGGTACAGAATCTGAAGGATG  |
| CMD1584 | <i>cirA</i> | CTGTCCAGACCACGAATACTTAC |
| CMD1585 | <i>ryhB</i> | ATCAGGAAGACCCTCGCGGAGAA |
| CMD1586 | <i>ryhB</i> | AGCACCCGGCTGGCTAAGTAATA |
| CMD1634 | <i>shiA</i> | TGAAGGGACGCTTTCGTTAAG   |
| CMD1635 | <i>shiA</i> | GGCGGTAATGCCATAGAGTAAA  |
| CMD1636 | <i>iucD</i> | GGATAACTGTGGTTGGTGGAG   |
| CMD1637 | <i>iucD</i> | GCCGTGAGACCCAGTTTATT    |
| CMD1640 | <i>iroE</i> | TCTTTCTTGCCTCACCTTATC   |
| CMD1641 | <i>iroE</i> | CGGAGCCTTTATCGGCTATATT  |
| CMD1808 | <i>iucB</i> | CGATGCGCTGGATCAGATATT   |
| CMD1809 | <i>iucB</i> | GAAGGCGGTACGATGGATAATG  |
| CMD1810 | <i>iucC</i> | GCTGAGCGGTCATCCTAAAT    |
| CMD1811 | <i>iucC</i> | GTCTGAAGGTGTTGGCATACT   |

Restriction sites are underlined and restriction endonucleases are indicated in parentheses.

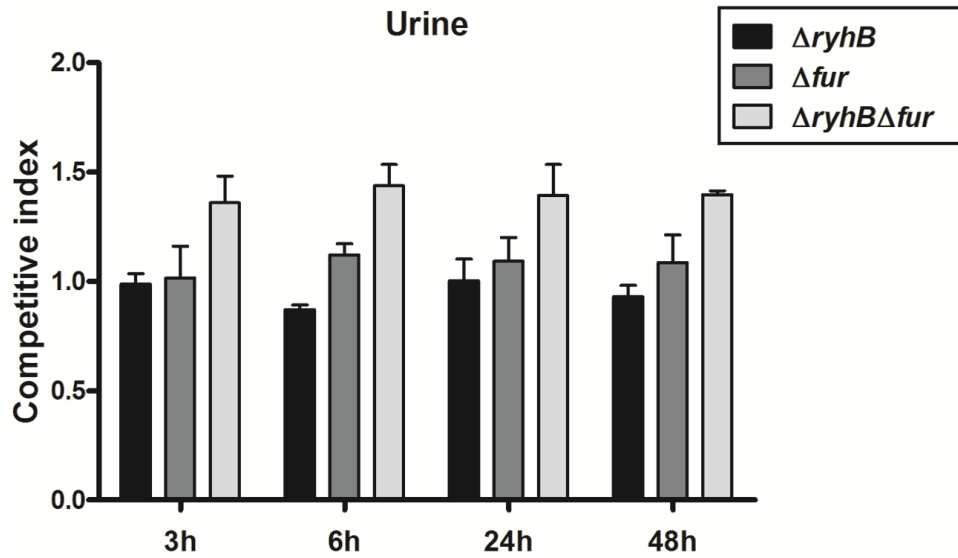

**Figure S1. Role of RyhB and Fur in competitive growth assay in human urine.**

Human urine was inoculated with a 1:1 ratio of CFT073 $\Delta lacZYA$  strain and one of the mutant strains ( $\Delta ryhB$ ,  $\Delta fur$  or  $\Delta ryhB\Delta fur$ ). Strains were grown without agitation at 37°C. The proportion of each strain was monitored and results are represented as the  $\log_{10}$  competitive indexes (CI). The CI represents the relative numbers of the two tested strains from the samples compared to the initial numbers of the strains in the inoculum. Negative CI values indicate a decreased capacity for the mutant strain to compete with the reference strain (CFT073 $\Delta lacZYA$ ). Results are the mean values and standard deviations of three biological experiments.

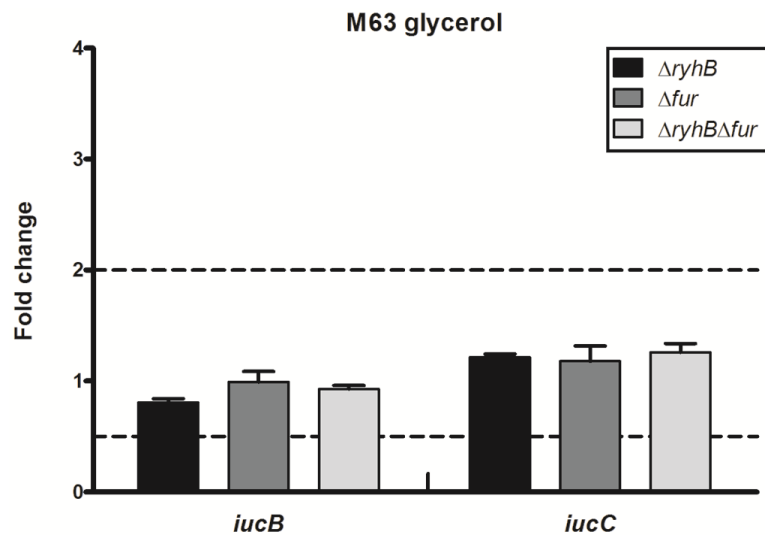

**Figure S2. Role of RyhB and Fur in the expression of *iucB* and *iucC* genes in M63-glycerol minimal medium.**

Expression of genes for the mutant strains in M63-glycerol minimal medium was compared to that of the wild-type CFT073 strain. The dashed lines correspond to the cut-off for a significant difference in expression. Results are the mean values and standard deviations of three biological experiments.
